# Supplementary material for: Lysosomal degradation of newly formed insulin granules contributes to β cell failure in diabetes
Source: Nat Commun. 2019 Jul 25;10:3312. doi: 10.1038/s41467-019-11170-4 (PMC6658524; doi:10.1038/s41467-019-11170-4)
Supplement: Supplementary file 1 — Supplementary Information [file 41467_2019_11170_MOESM1_ESM.pdf]

**Lysosomal degradation of newly formed insulin granules  
contributes to  $\beta$  cell failure in diabetes**

**Pasquier *et al.***

***Supplementary information***

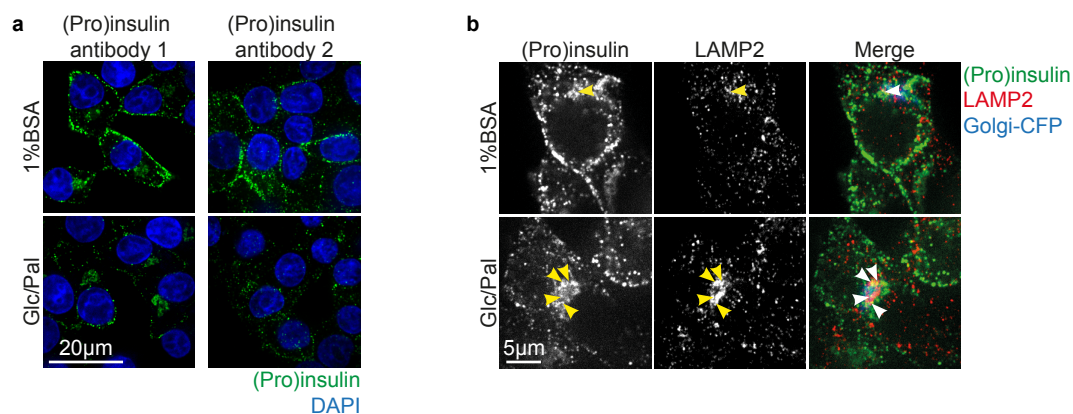

**Supplementary Figure 1: Glucose/Palmitate treatment induces co-localisation of secretory granules with lysosomes in the Golgi area.** (a) Immunofluorescence (IF) of insulin+proinsulin (“(pro)insulin”) (green) in INS1 cells treated with control (1% BSA, 11 mM glucose, “1% BSA”) or glucolipotoxic (1% BSA, 33.3 mM Glucose and 0.4 mM Palmitate, “Glc/Pal”) media for 20h. Nuclei were stained with DAPI. (b) IF of (pro)insulin (green) and LAMP2 (red) in INS1 cells treated with 1% BSA or Glc/Pal media for 20h. Golgi-CFP was used to visualize the Golgi apparatus. Arrowheads point to (pro)insulin/LAMP2 co-localization.

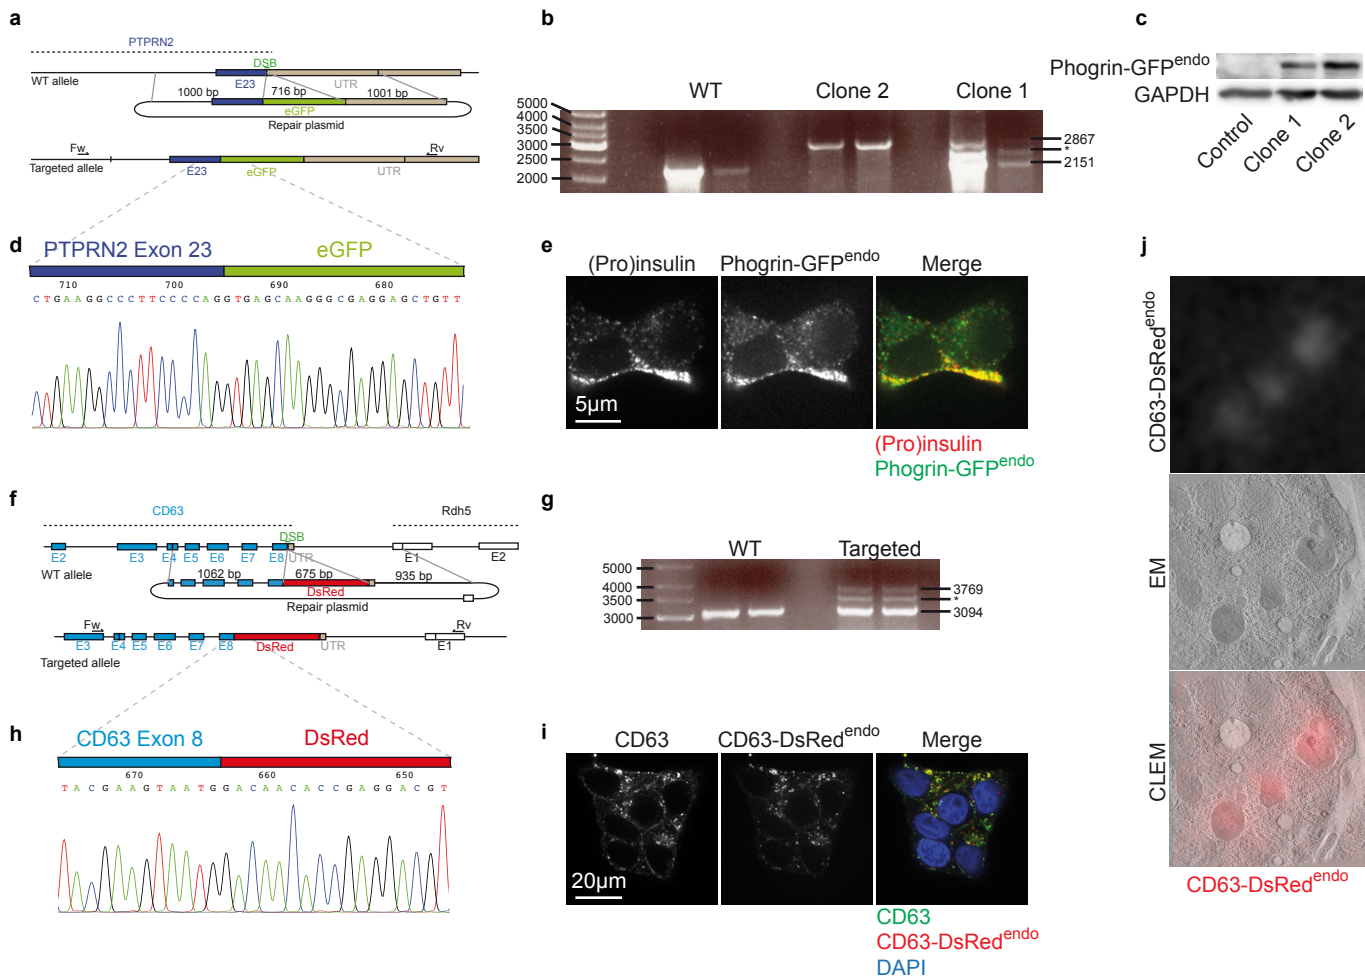

**Supplementary Figure 2. Generation of the *INS1*<sup>PGCD</sup> knock-in cells.** (a) Diagram showing the strategy for homologous recombination. EGFP was introduced in frame 3' of the last exon of *PTPRN2* (Phogrin). Forward and Reverse genotyping primers are designated as Fw and Rv, respectively. DSB, Double-stranded break. E, exon. UTR, Untranslated Region. (b) Validation of single clones by PCR. Expected sizes of targeted (2867bp) or wild type (2151bp) alleles are indicated. Clone 1 contained heterozygous insertion, clone 2 contained homozygous insertion of eGFP coding sequence. \*, unspecific band. (c) Immunoblot of GFP using lysates from clones 1 and 2. GFP band matched the expected size of GFP-Phogrin<sup>endo</sup> at 100 kDa. GAPDH was used as a loading control. Clone 2 was used to generate a double knock-in line. (d) Sanger sequencing verification of eGFP insertion. (e) Immunofluorescence (IF) of insulin+proinsulin (“(pro)insulin”) (red) and Phogrin-GFP<sup>endo</sup> (green) in Phogrin-GFP knock-in INS1 cells. (f) Diagram showing the strategy for homologous recombination. DsRed was introduced in frame 3' of the last exon of *CD63*. (g) Validation of single clones by PCR. Expected sizes of targeted (3769bp) or wild type (3094bp) alleles are indicated. (h) Sanger sequencing verification of DsRed insertion. (i) IF of CD63 and CD63-DsRed<sup>endo</sup> in CD63-DsRed knock-in INS1 cells. (j) On-section Correlative Light and Electron Microscopy analysis of CD63-DsRed knock-in INS1 cells.

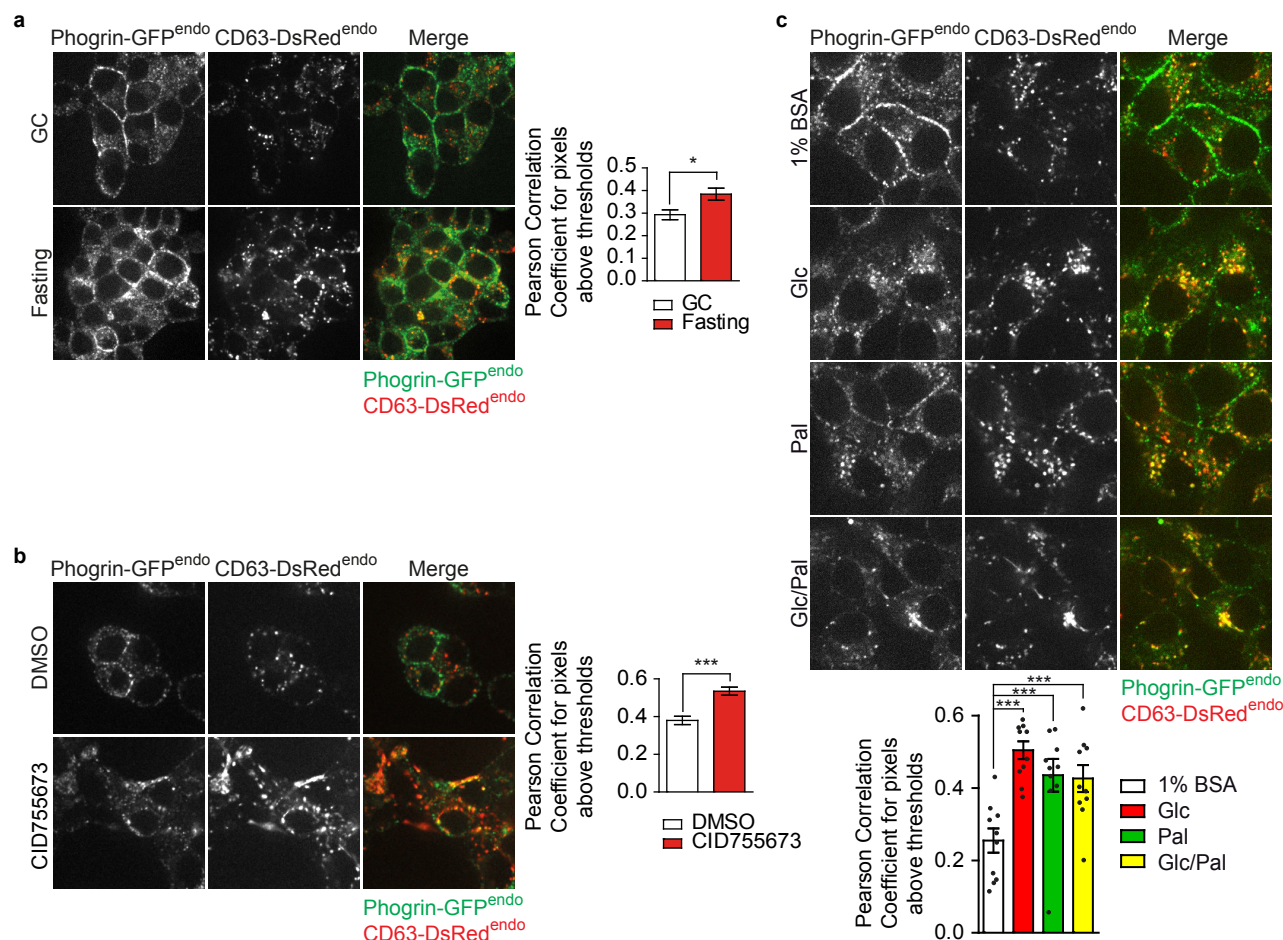

**Supplementary Figure 3. Increased co-localization between Phogrin-GFP<sup>endo</sup> and CD63-DsRed<sup>endo</sup> upon fasting, PKD inhibition, gluco- and lipotoxic conditions in INS1<sup>PGCD</sup> cells.** (a) Live-cell imaging and quantification of the co-localization events between Phogrin-GFP<sup>endo</sup> (green) and CD63-DsRed<sup>endo</sup> (red) in INS1<sup>PGCD</sup> cells upon growing culture (GC) or fasting (Hank's Balanced Salt Solution, 2.8 mM Glucose) conditions for 1h using Pearson's correlation coefficient for pixels above threshold.  $N_{GC}=26$ ;  $N_{Fasting}=19$ ;  $*P<0.05$ , two-tailed t-test. (b) Live-cell imaging and quantification of the co-localization events between Phogrin-GFP<sup>endo</sup> (green) and CD63-DsRed<sup>endo</sup> (red) in INS1<sup>PGCD</sup> cells upon control treatment (DMSO) or PKD inhibition (CID755673, 30  $\mu$ M) for 12h using Pearson's correlation coefficient for pixels above threshold.  $N_{DMSO}=12$ ;  $N_{CID755673}=12$ ;  $***P<0.001$ , two-tailed t-test. (c) Live-cell imaging and quantification of the co-localization events between Phogrin-GFP<sup>endo</sup> (green) and CD63-DsRed<sup>endo</sup> (red) in INS1<sup>PGCD</sup> cells treated with control (1% BSA, 11 mM glucose, "1% BSA"), glucotoxic (1% BSA, 33.3 mM Glucose, "Glc"), lipotoxic (1% BSA, 0.4 mM Palmitate, "Pal") or glucolipotoxic (1% BSA, 33.3 mM Glucose and 0.4 mM Palmitate, "Glc/Pal") media for 40h using Pearson's correlation coefficient for pixels above threshold.  $N=10$  per each condition.  $***P<0.001$ , two-tailed t-test. In a, b and c data are shown as mean  $\pm$  SEM, source data are provided as a Source Data file.

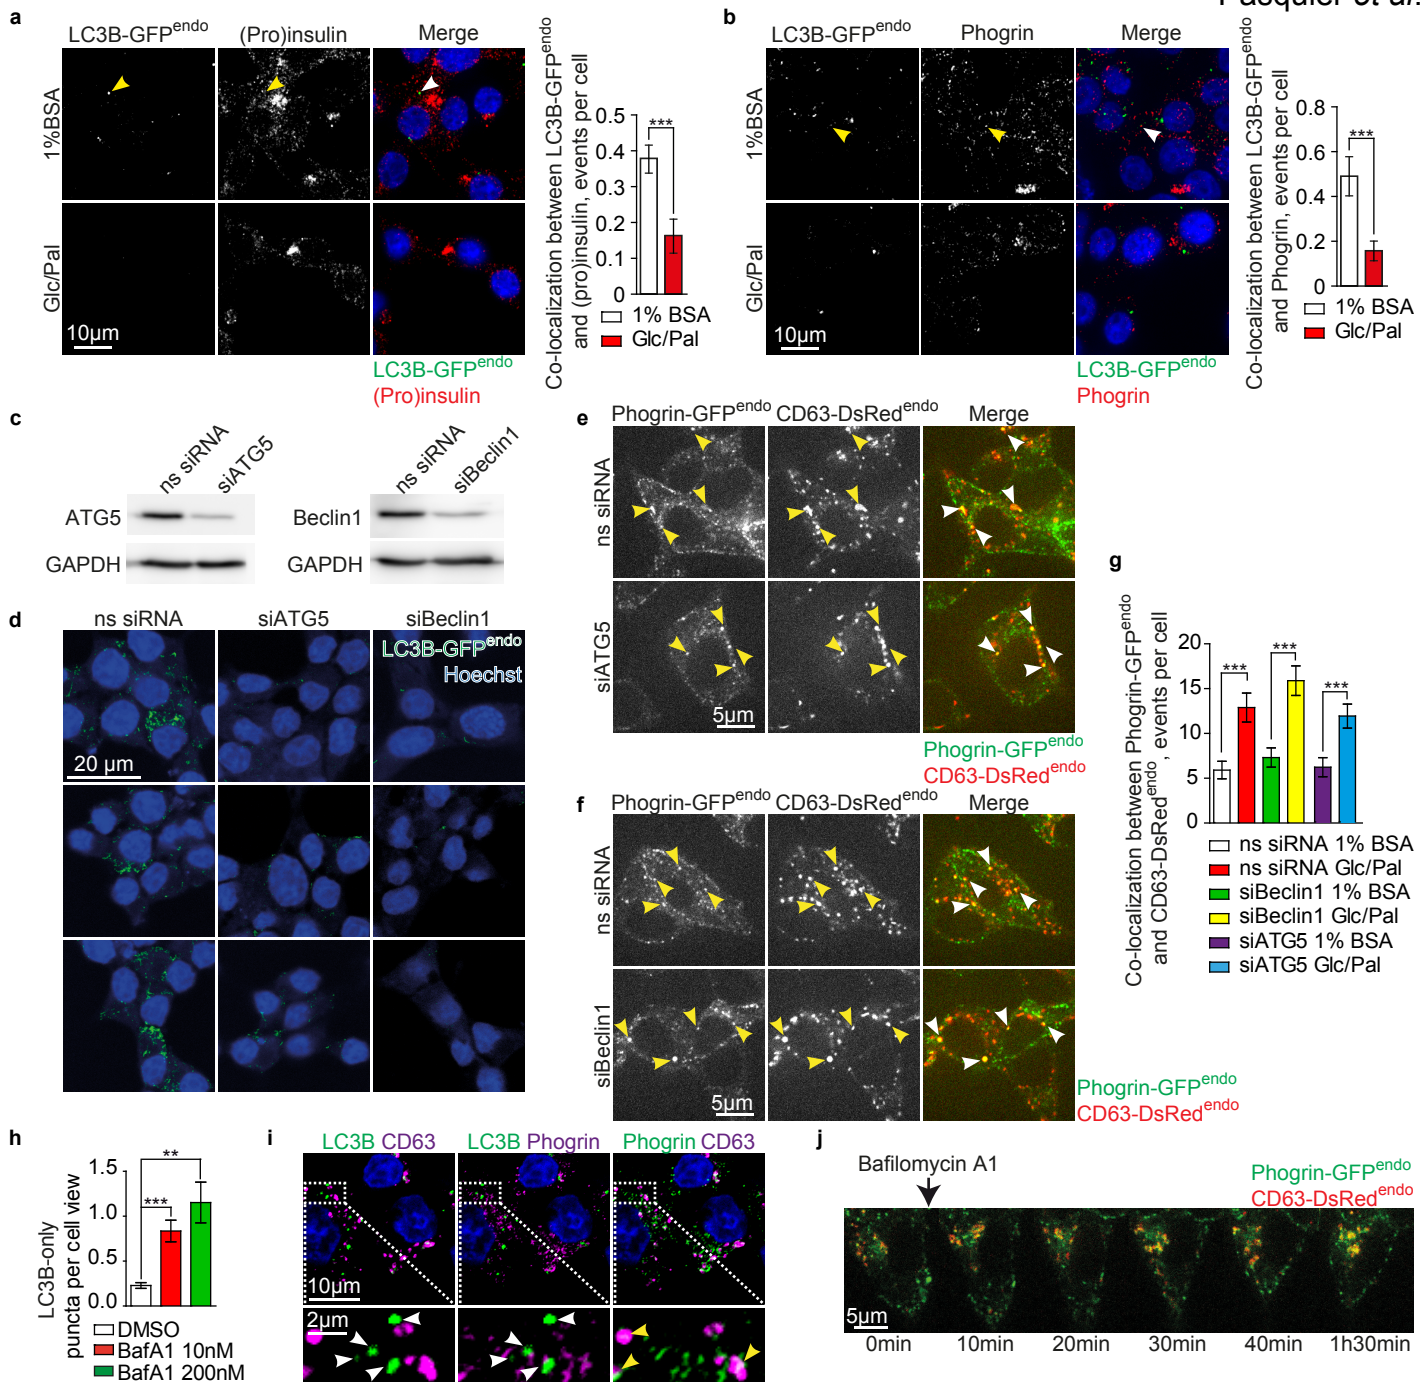

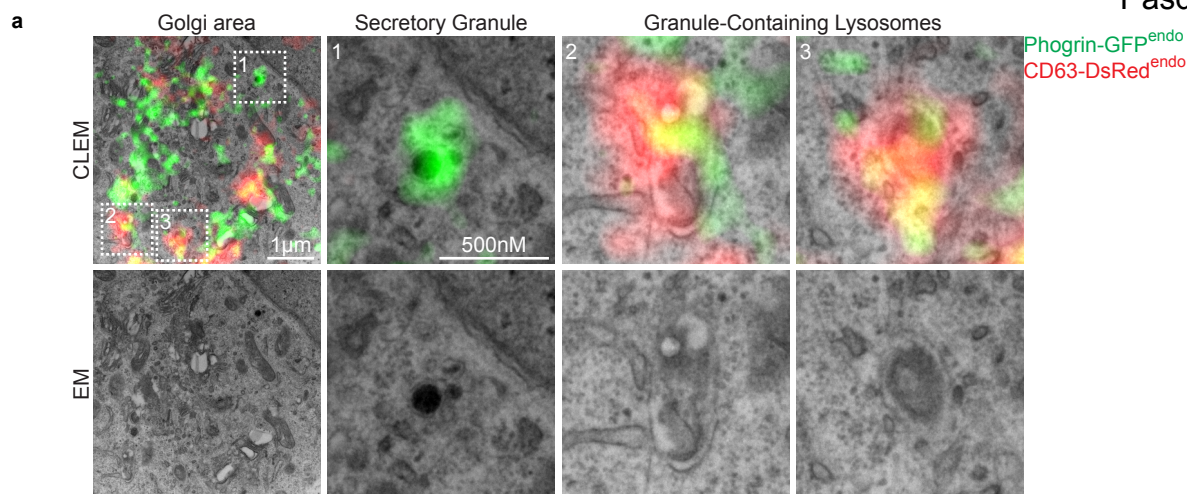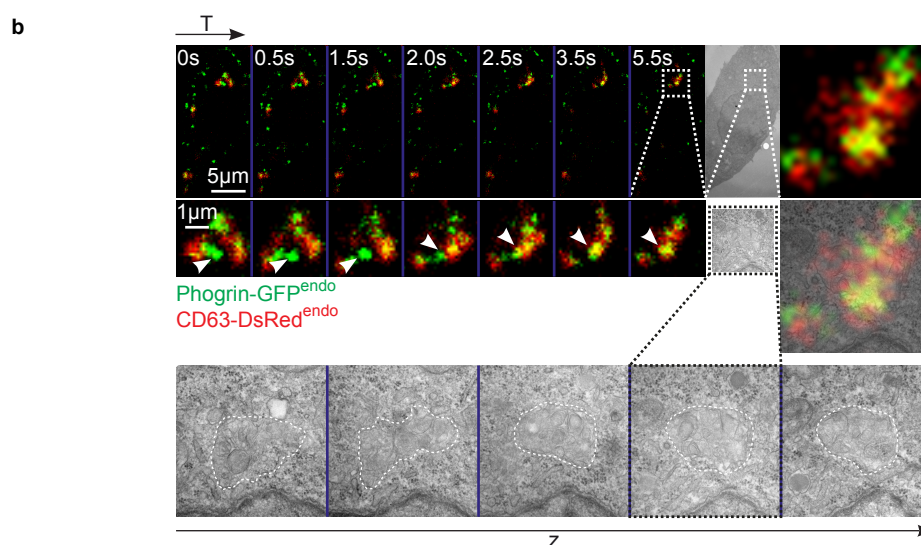

**Supplementary Figure 5. Correlative light and electron microscopy (CLEM) analysis of INS1<sup>PGCD</sup> cells endogenously expressing Phogrin-GFP<sup>endo</sup> and CD63-DsRed<sup>endo</sup>.** (a) CLEM of INS1<sup>PGCD</sup> cells treated with glucolipotoxic (1% BSA, 33.3 mM Glucose and 0.4 mM Palmitate, “Glc/Pal”) media for 20h. Insets show a Phogrin-GFP<sup>endo</sup>-positive secretory granule and Phogrin-GFP<sup>endo</sup>/CD63-DsRed<sup>endo</sup>-positive granule-containing lysosomes. (b) Top: Live cell imaging of INS1<sup>PGCD</sup> cells treated with Glc/Pal for 24h and imaged at indicated times, which was followed by CLEM (live-CLEM). Arrowheads point to a fusion event between secretory granule and granule-containing lysosome. Live video is shown in **Supplementary Movie 1**. Bottom: serial EM sections of the region of interest.

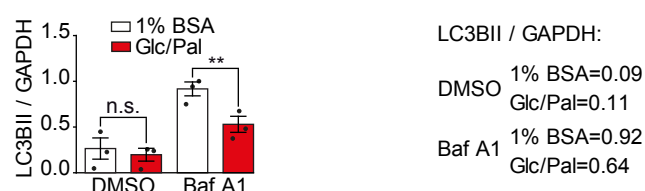

**Supplementary Figure 6. Autophagic flux in  $\beta$  cells is decreased upon glucolipotoxic conditions.** Quantification of LC3BII/GAPDH ratio from immunoblots shown in **Fig. 2d**. for INS1 cells (left, N=3 per each group; n.s.: not significant, \*\*P<0.01, two-tailed t-test) and human islets (right, N=1), source data are provided as a Source Data file.

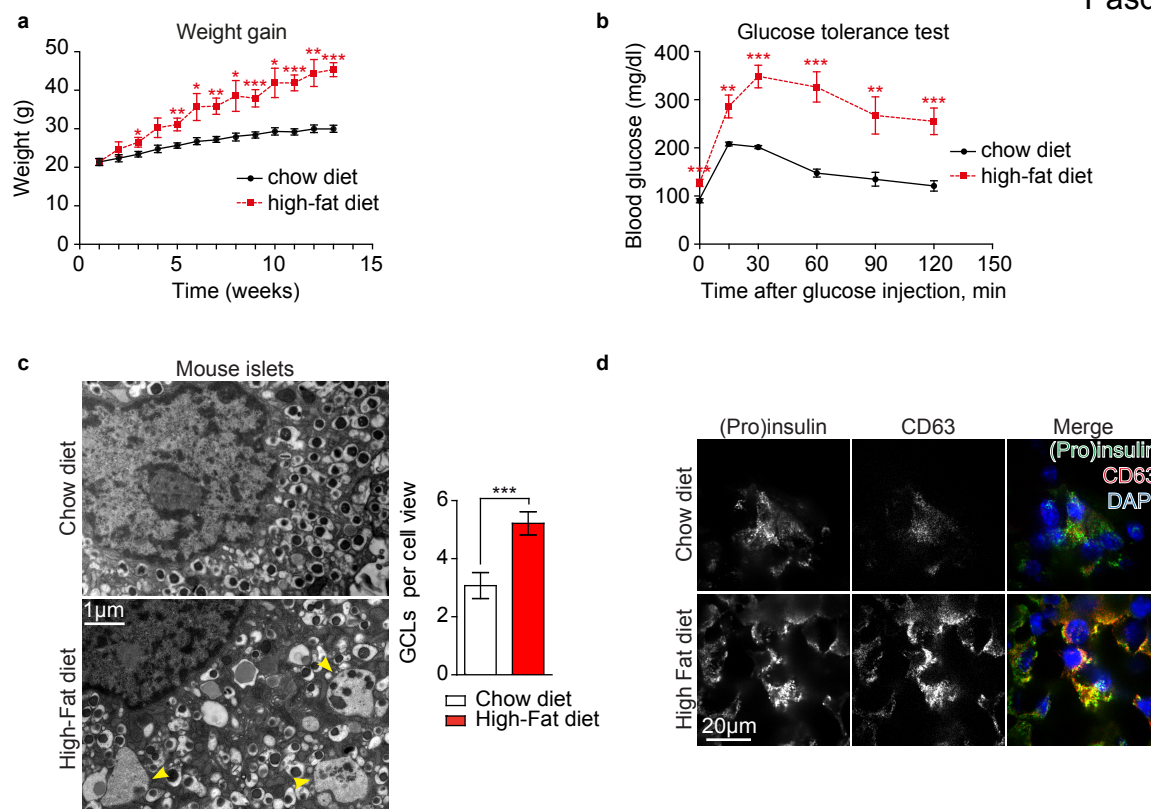

**Supplementary Figure 7. Increased granule-containing lysosomes (GCLs) in  $\beta$  cells of High Fat diet-fed mice.** (a) Time-course of the body weight of chow diet-fed mice or high fat diet-fed mice.  $N=6-11$  mice per time point;  $*P<0.05$ ,  $**P<0.01$ ,  $***P<0.001$ , two-tailed t-test. (b) Glucose tolerance test (GTT) in mice fed with chow diet or high fat diet for 13 weeks.  $N=11$  mice per group;  $**P<0.01$ ,  $***P<0.001$ , two-tailed t-test. (c) Electron microscopy analysis of  $\beta$  cells of mice islets from mice fed with chow diet or high fat diet for 13 weeks. Arrowheads indicate GCLs. Quantification of granule-containing lysosomes (GCLs) per cell view.  $N_{CD}=27$ ;  $N_{HFD}=37$  from 3 mice per group;  $***P<0.001$ , two-tailed t-test. (d) Immunofluorescence (IF) of (pro)insulin (green) and CD63 (red) in  $\beta$  cells of mice fed with chow diet or high fat diet for 13 weeks.  $N=3$  mice per group. In **a**, **b** and **c** data are shown as mean  $\pm$  SEM, source data are provided as a Source Data file.

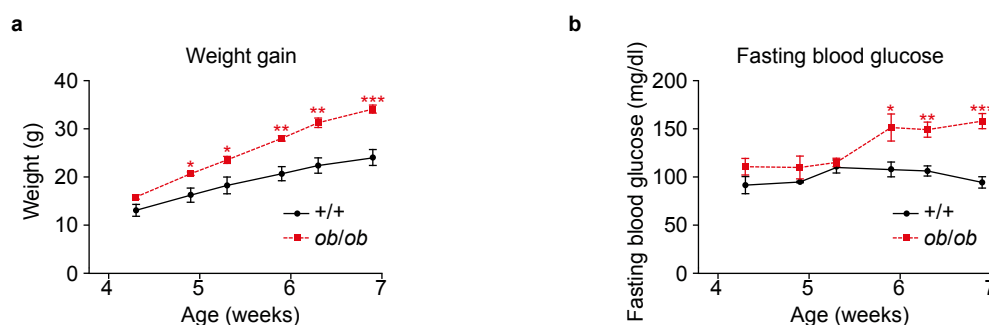

**Supplementary Figure 8. BTBR *ob/ob* mice progressively develop diabetes at early age.** (a) Time-course of the body weight of BTBR  $+/+$  and BTBR  $ob/ob$  mice.  $N_{+/+}=5$ ;  $N_{ob/ob}=5$ ;  $*P<0.05$ ,  $**P<0.01$ ,  $***P<0.001$ , two-tailed t-test. (b) Time-course of fasting blood glucose levels of BTBR  $+/+$  and BTBR  $ob/ob$  mice.  $N_{+/+}=5$ ;  $N_{ob/ob}=5$ ;  $*P<0.05$ ,  $**P<0.01$ ,  $***P<0.001$ , two-tailed t-test. In **a** and **b** data are shown as mean  $\pm$  SEM, source data are provided as a Source Data file.

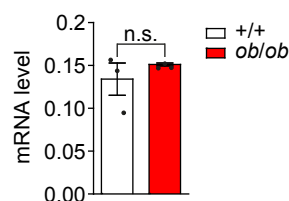

**Supplementary Figure 9. p62 mRNA levels are similar in BTBR  $+/+$  and BTBR *ob/ob* mice.** Quantitative RT-PCR using mRNA isolated from pancreatic islets of 8-week old BTBR  $+/+$  and BTBR  $ob/ob$  mice using primer pairs amplifying cDNA of p62. The expression values were normalized to a housekeeping gene HPRT.  $N_{+/+}=3$ ;  $N_{ob/ob}=3$ ; n.s.: not significant, two-tailed t-test. Data are shown as mean  $\pm$  SEM, source data are provided as a Source Data file.

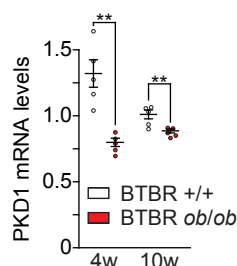

**Supplementary Figure 10. Analysis of PKD1 (*Prkcm*) expression in islets of wt and *ob/ob* BTBR mice (from Keller *et al.*, *Genome Res.* 2008). RNA seq using mRNA isolated from pancreatic islets of 4-week old and 10-week old BTBR *+/+* and BTBR *ob/ob* mice. The expression values were normalized to the reference pool derived from all 20 individuals (lean and *ob/ob* at 4 and 10 weeks of age,  $n=5$  for each group).  $N_{4w, +/+}=5$ ;  $N_{4w, ob/ob}=5$ ;  $N_{10w, +/+}=5$ ;  $N_{10w, ob/ob}=5$ .  $**P<0.01$ , two-tailed t-test. Lines represent mean  $\pm$  SEM, source data are provided as a Source Data file.**

a

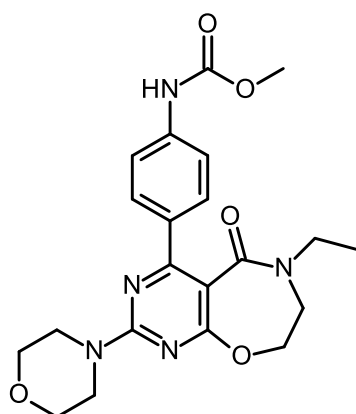

**Compound A** - MW: 427.45 ( $C_{21}H_{25}N_5O_5$ )

b

|                   | p38 $\delta$<br>IC <sub>50</sub> (nM) | p38 $\alpha$<br>IC <sub>50</sub> (nM) | p38 $\gamma$<br>IC <sub>50</sub> (nM) | PKD1<br>IC <sub>50</sub> (nM) |
|-------------------|---------------------------------------|---------------------------------------|---------------------------------------|-------------------------------|
| <b>Compound A</b> | 380                                   | > 30 $\mu$ M                          | 710                                   | > 30 $\mu$ M                  |

c

| Kinases             | Compound A<br>1 $\mu$ M | Compound A<br>10 $\mu$ M | Kinases                                      | Compound A<br>1 $\mu$ M | Compound A<br>10 $\mu$ M |
|---------------------|-------------------------|--------------------------|----------------------------------------------|-------------------------|--------------------------|
| Abl(h)              | 6                       | 8                        | JAK3(h)                                      | 0                       | -5                       |
| ALK(h)              | 4                       | 0                        | KDR(h)                                       | -16                     | -12                      |
| AMPK $\alpha$ 2(h)  | -5                      | 5                        | Lck(h) activated                             | -7                      | 13                       |
| Aurora-B(h)         | -24                     | -28                      | Lyn(h)                                       | -2                      | 13                       |
| BrSK2(h)            | 5                       | 5                        | LRRK2(h)                                     | -18                     | -11                      |
| BTk(h)              | -1                      | 0                        | MAPK1(h)                                     | 0                       | 5                        |
| CaMKII(h)           | 5                       | 11                       | MELK(h)                                      | 2                       | 9                        |
| CaMKII $\delta$ (h) | -6                      | 1                        | Met(h)                                       | -16                     | -7                       |
| CDK1/cyclinB(h)     | -5                      | 4                        | MST2(h)                                      | -16                     | -2                       |
| CDK5/p25(h)         | -2                      | -2                       | mTOR(h)                                      | -1                      | 48                       |
| CDK9/cyclin T1(h)   | -16                     | 3                        | p70S6K(h)                                    | 15                      | 59                       |
| CLK2(h)             | -2                      | -2                       | PAK4(h)                                      | -2                      | 4                        |
| cKit(h)             | 4                       | 6                        | PEK(h)                                       | -12                     | -11                      |
| c-RAF(h)            | -5                      | 2                        | PDGFR $\alpha$ (h)                           | 1                       | 0                        |
| cSRC(h)             | -9                      | -12                      | Pim-1(h)                                     | -6                      | -7                       |
| DDR2(h)             | 6                       | 15                       | Pim-2(h)                                     | 8                       | 7                        |
| DYRK2(h)            | -10                     | -10                      | PKA(h)                                       | -8                      | -22                      |
| EGFR(h)             | -17                     | 4                        | PKB $\alpha$ (h)                             | 14                      | 17                       |
| EphA1(h)            | 0                       | 7                        | PKC $\beta$ II(h)                            | 0                       | 1                        |
| EphA3(h)            | 8                       | 12                       | PKC $\epsilon$ (h)                           | 8                       | 12                       |
| EphB1(h)            | 6                       | 10                       | PKC $\theta$ (h)                             | 7                       | 7                        |
| EphB4(h)            | -3                      | 8                        | PKC $\zeta$ (h)                              | 0                       | 10                       |
| FGFR1(h)            | 9                       | 6                        | Plk1(h)                                      | 2                       | 11                       |
| Flt1(h)             | -30                     | -28                      | Ron(h)                                       | 10                      | 9                        |
| Flt3(h)             | -30                     | -25                      | Rsk1(h)                                      | -11                     | 5                        |
| GSK3 $\alpha$ (h)   | -9                      | -7                       | SAPK2a(h)                                    | -16                     | 9                        |
| GSK3 $\beta$ (h)    | 1                       | 12                       | SAPK3(h)                                     | 11                      | 64                       |
| Hck(h) activated    | -5                      | 5                        | Syk(h)                                       | 4                       | 20                       |
| IKK $\epsilon$ (h)  | 16                      | 18                       | TrkA(h)                                      | -21                     | 5                        |
| IR(h)               | -21                     | -14                      | PI3 Kinase (p110 $\alpha$ /p85 $\alpha$ )(h) | -1                      | 2                        |

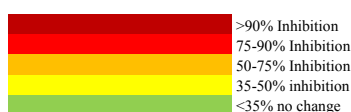

d

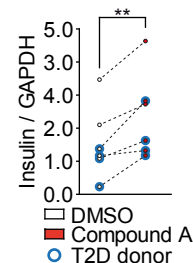

**Supplementary Figure 11. Generation of Compound A selectively inhibiting p38 $\delta$ .** (a) Chemical structure of Compound A. (b) Selectivity profile of Compound A versus p38 $\delta$ , p38 $\alpha$ , p38 $\gamma$  and PKD1. (c) Eurofins Pharma Discovery Services Kinase Profiler<sup>TM</sup> (60 kinases). (d) Quantification of immunoblots shown in **Fig. 4g** and **h**. Batches of islets were independently isolated from 2 non-diabetic and 4 T2D donors and treated as indicated.  $**P<0.01$ , two-tailed, paired t-test. Source data are provided as a Source Data file.

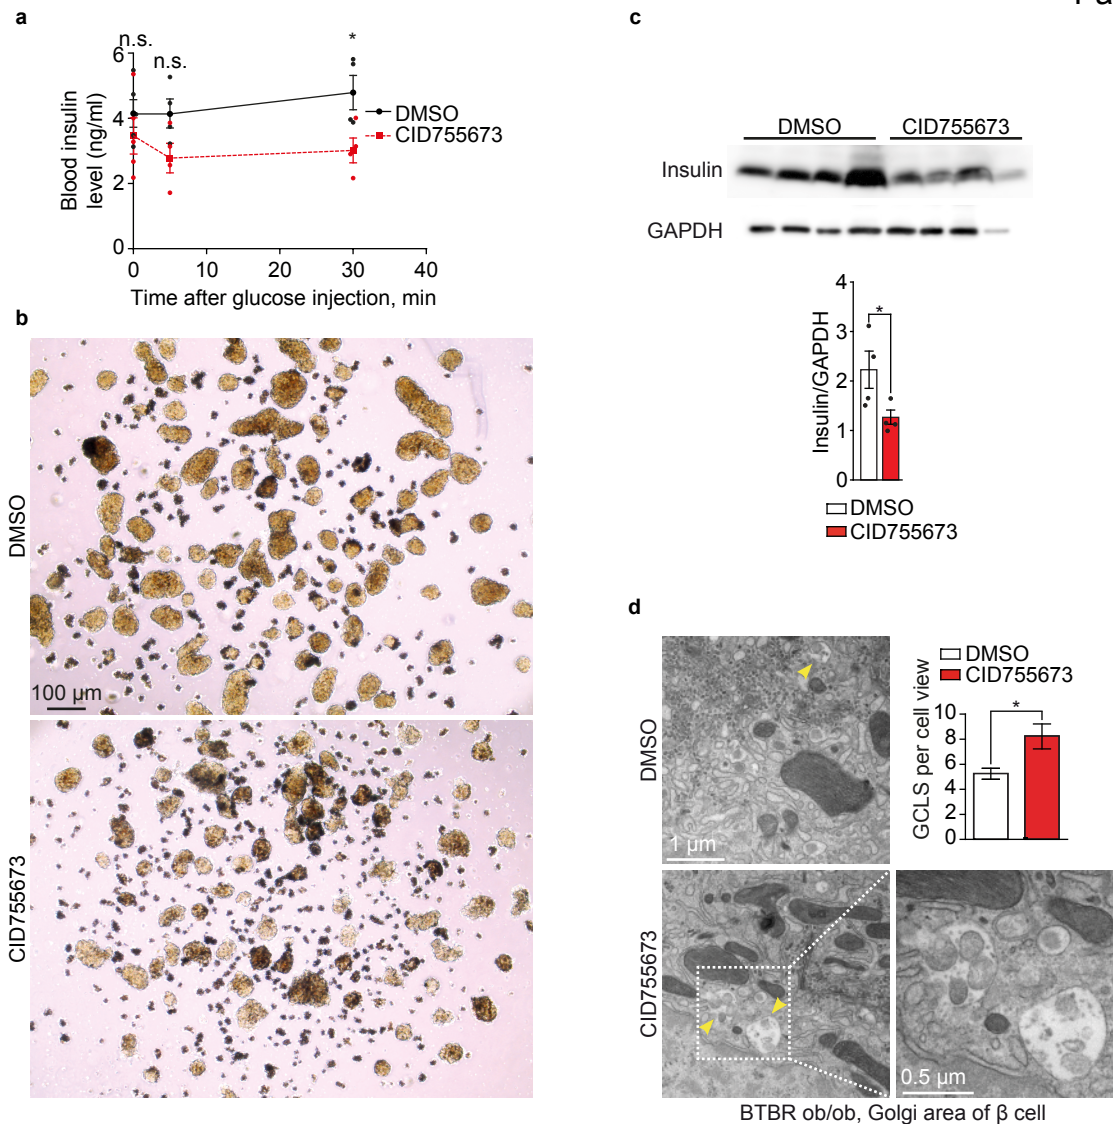

**Supplementary Figure 12. PKD Inhibition *in vivo* reduces insulin secretion and insulin content levels, and increases the number of granule-containing lysosomes (GCLs) in pancreatic β cells.** (a) Blood insulin levels in response to glucose injection in BTBR ob/ob mice implanted with osmotic pumps containing control solvent (DMSO) or CID755673.  $N_{\text{DMSO}}=5$ ;  $N_{\text{CID755673}}=5$ . \* $P<0.05$ , two-tailed t-test. (b) Brightfield image of freshly isolated islets derived from BTBR ob/ob mice, treated with DMSO or CID755673. (c) Immunoblot of insulin using lysates of islets isolated from BTBR ob/ob mice, treated with DMSO or CID755673. GAPDH was used as a loading control. Quantification of Insulin/GAPDH ratio.  $N=4$  per group; \* $P<0.05$ , two-tailed t-test. (d) Electron microscopy of β cells of islets isolated from BTBR ob/ob mice implanted with osmotic pumps containing control solvent (DMSO) or CID755673. Arrowheads point to GCLs. Quantification of GCLs per cell view.  $N_{\text{DMSO}}=25$  cells and  $N_{\text{CID755673}}=27$  cells from 5 islets per each group. \* $P<0.05$ , Mann-Whitney U-test. In **a**, **c** and **d** data are shown as mean  $\pm$  SEM, source data are provided as a Source Data file.

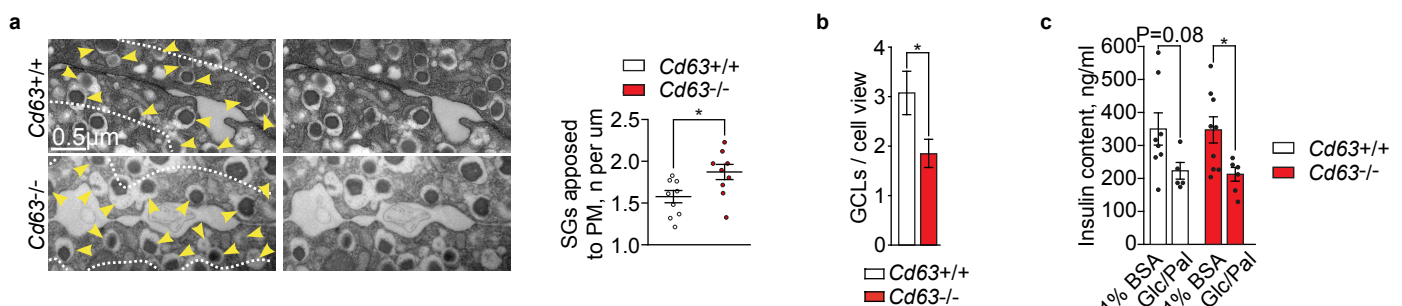

**Supplementary Figure 13. Increased amount of secretory granules (SGs) in plasma membrane (PM) area and decreased amount of GCLs in Golgi area of β cells of *Cd63*<sup>-/-</sup> mice.** (a) Electron microscopy of β cells of islets isolated from *Cd63*<sup>+/+</sup> and *Cd63*<sup>-/-</sup> mice. Arrowheads point to SGs in PM area. PM length (μm) and SGs in the PM area (defined as a band of 500 nm thickness under PM) were quantified in 9 fields of view from 3 mice per each genotype. Quantification of SGs per PM, μm. \* $P<0.05$ , two-tailed t-test. Lines represent mean  $\pm$  SEM. (b) Quantification of granule-containing lysosomes (GCLs) per cell view. *Cd63*<sup>+/+</sup> group is identical to shown in **Supplementary Figure 7c** (chow diet).  $N_{\text{Cd63}+/+}=27$ ;  $N_{\text{Cd63}-/}=58$  from 3 mice per group; \* $P<0.05$ , two-tailed t-test. (c) Total insulin content levels from experiment shown in **Figure 5f**. Batches of islets were independently isolated from *Cd63*<sup>+/+</sup> and *Cd63*<sup>-/-</sup> mice;  $N_{1\% \text{ BSA}}=8$  (*Cd63*<sup>+/+</sup>), 9 (*Cd63*<sup>-/-</sup>),  $N_{\text{GlcPal}}=5$  (*Cd63*<sup>+/+</sup>), 6 (*Cd63*<sup>-/-</sup>). \* $P<0.05$ , two-tailed t-test. Data are shown as mean  $\pm$  SEM, source data are provided as a Source Data file.

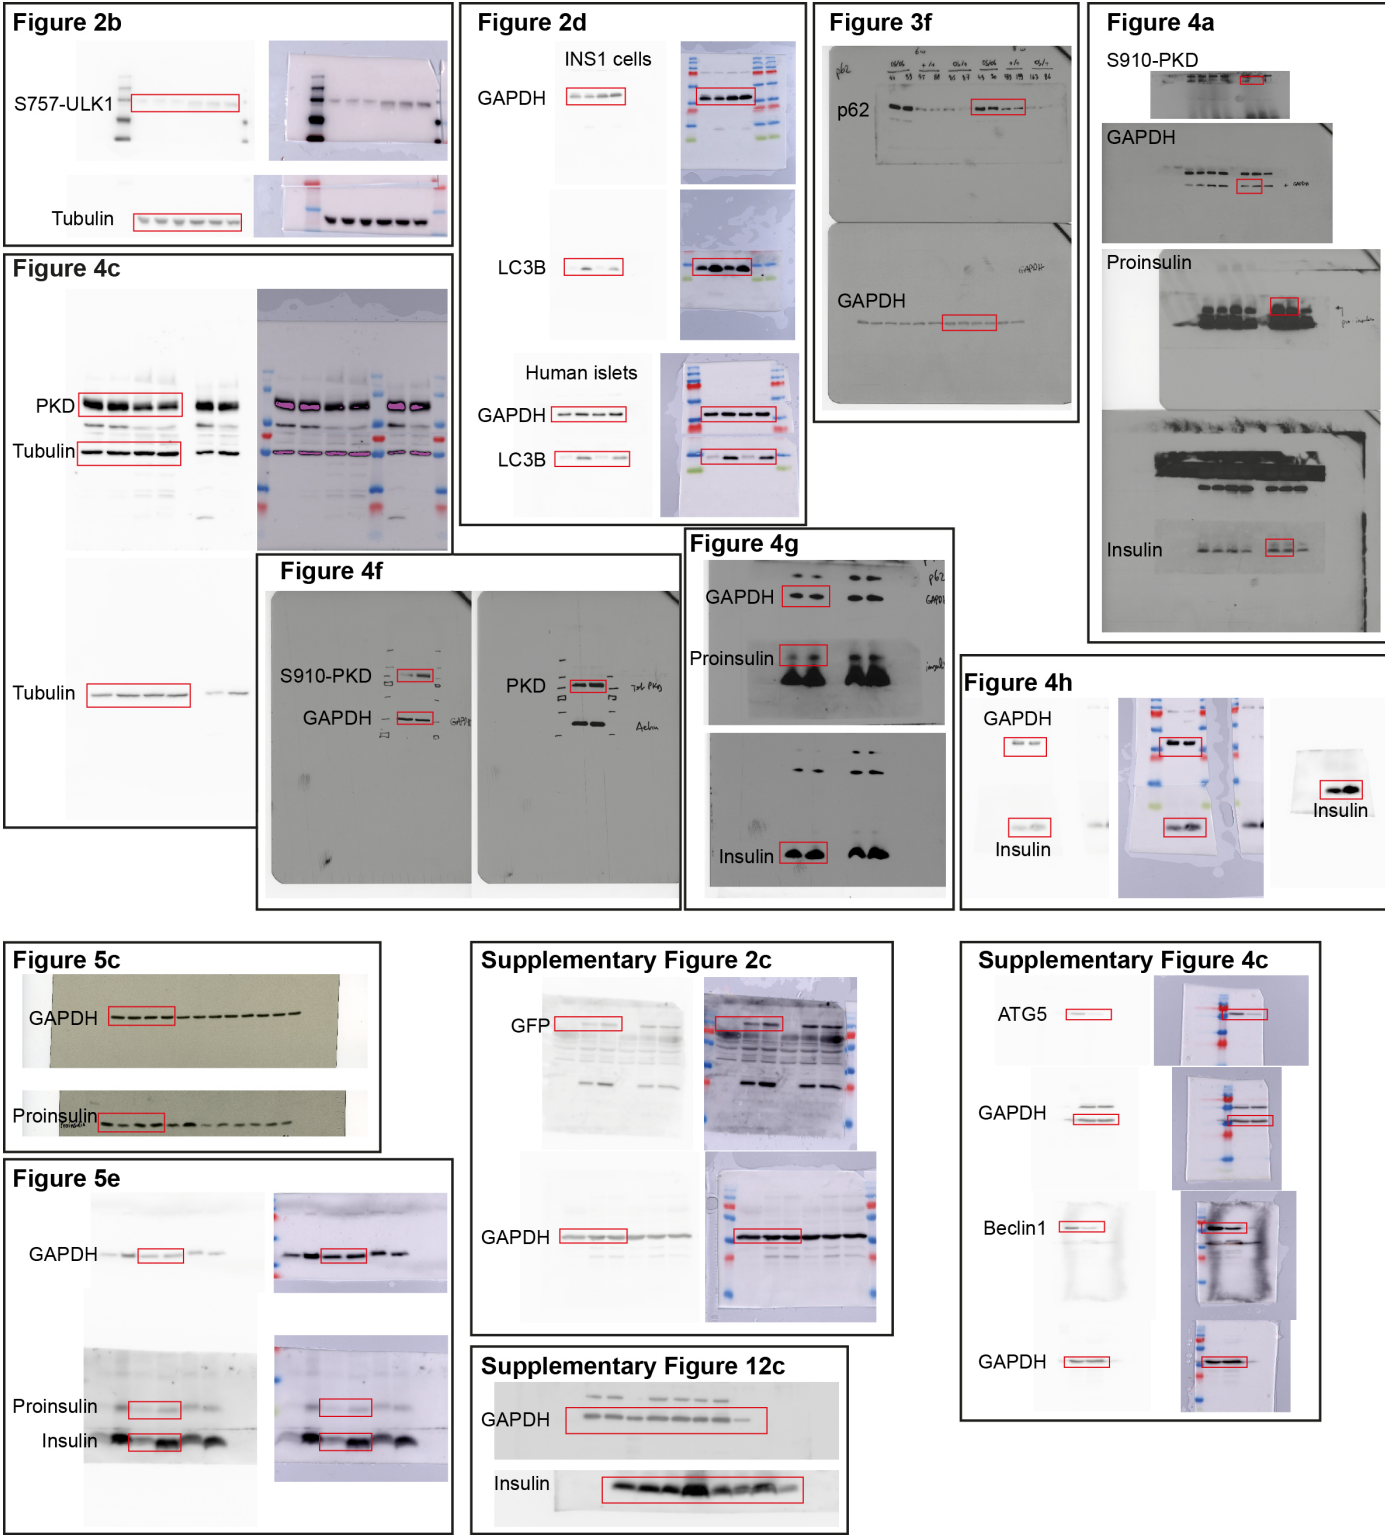

Supplementary Figure 14. Uncropped scans of immunoblots presented in indicated figures.
